# Supplementary material
Source: ML conference proceedings conference paper supplement (https://openreview.net/forum?id=1ziIqFo4Tj)
Supplement: supplementary_material [file attachment]

## Sheet: tosca
cat0	cat6
cat1	cat10
cat2	cat6
cat3	cat2
cat4	cat1
cat5	cat4
cat6	cat3
cat7	cat1
cat8	cat7
cat9	cat5
cat10	cat3
centaur0	centaur5
centaur1	centaur4
centaur2	centaur0
centaur3	centaur0
centaur4	centaur5
centaur5	centaur2
david0	david12
david1	david6
david6	david12
david10	david12
david11	david13
david12	david1
david13	david12
dog0	dog6
dog1	dog0
dog2	dog0
dog3	dog6
dog5	dog3
dog6	dog1
dog7	dog8
dog8	dog5
dog10	dog8
gorilla1	gorilla5
gorilla5	gorilla14
gorilla8	gorilla1
gorilla14	gorilla8
horse0	horse10
horse5	horse7
horse6	horse14
horse7	horse15
horse10	horse7
horse14	horse10
horse15	horse10
horse17	horse5
michael0	michael2
michael1	michael10
michael2	michael16
michael3	michael1
michael4	michael5
michael5	michael7
michael6	michael16
michael7	michael6
michael8	michael9
michael9	michael13
michael10	michael17
michael11	michael4
michael12	michael15
michael13	michael2
michael14	michael5
michael15	michael14
michael16	michael7
michael17	michael14
michael18	michael4
michael19	michael3
victoria0	victoria2
victoria1	victoria17
victoria2	victoria21
victoria4	victoria0
victoria7	victoria4
victoria10	victoria25
victoria12	victoria2
victoria17	victoria0
victoria21	victoria0
victoria23	victoria21
victoria24	victoria0
victoria25	victoria17
wolf0	wolf1
wolf1	wolf2
wolf2	wolf0
