# Supplementary material
Source: ML conference proceedings conference paper supplement (https://openreview.net/forum?id=1ziIqFo4Tj)
Supplement: supplementary_material [file scape_test.xlsx]

## Sheet: scape
0	37
1	2
2	55
3	50
4	41
5	59
6	57
7	19
8	68
9	70
10	64
11	21
12	60
13	38
14	68
15	54
16	67
17	15
18	6
19	35
20	10
21	45
22	27
23	71
24	48
25	58
26	8
27	5
28	18
29	43
30	49
31	15
32	46
33	64
34	25
35	47
36	50
37	11
38	26
39	46
40	18
41	27
42	28
43	16
44	56
45	42
46	11
47	30
48	7
49	40
50	55
52	34
53	40
54	31
55	52
56	8
57	36
58	29
59	52
60	14
61	45
62	26
63	38
64	30
65	33
66	17
67	1
68	60
69	24
70	2
71	37
